# Supplementary material for: Optimization of Callus and Cell Suspension Cultures of Lycium schweinfurthii for Improved Production of Phenolics, Flavonoids, and Antioxidant Activity
Source: MDPI journal article supplement (doi:10.3390/horticulturae8050394), 2022-04-30
Supplement: s1 [file s1]

Archive with 1 entries (1 files):
- horticulturae-1697800-supplementary.pdf
