# Supplementary material for: Optimization of Callus and Cell Suspension Cultures of Lycium schweinfurthii for Improved Production of Phenolics, Flavonoids, and Antioxidant Activity
Source: MDPI journal article supplement (doi:10.3390/horticulturae8050394), 2022-04-30
Supplement: s1 [file s1 › horticulturae-1697800-supplementary.pdf]

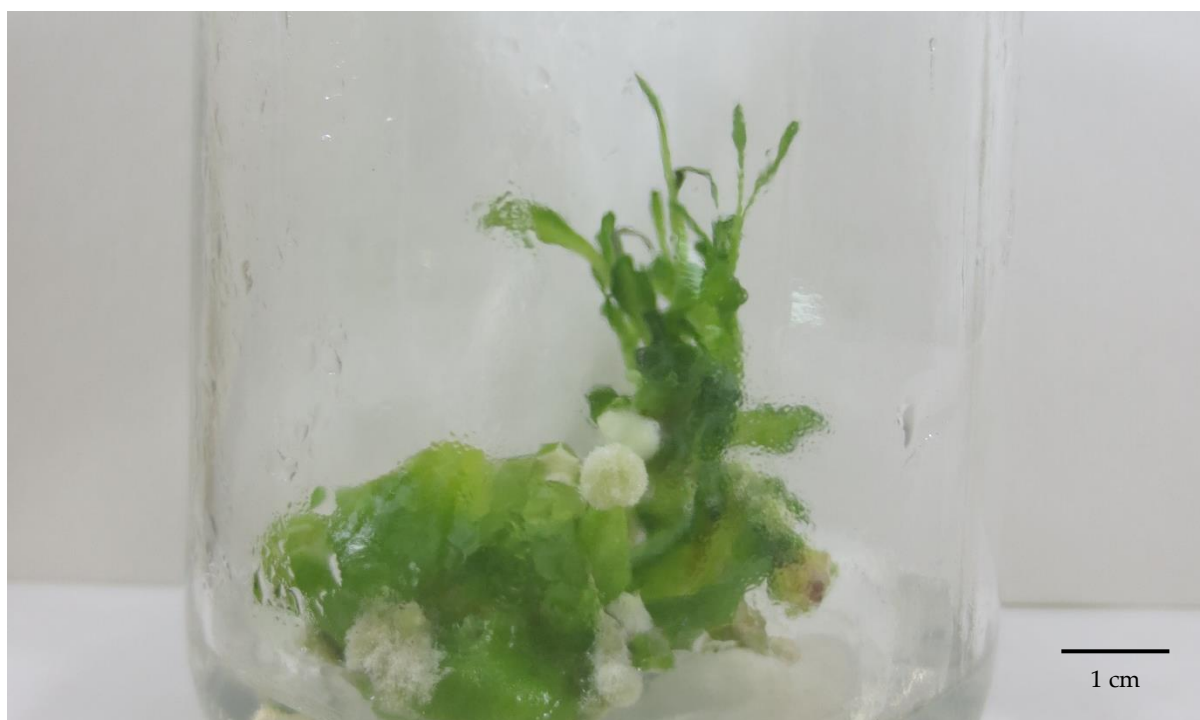

Figure S1. Leaf enlargement and new shoot formation of *L. schweinfurthii* on MS medium supplemented with 1 mgL<sup>-1</sup> BA after 7 weeks of culture using leaf explants.

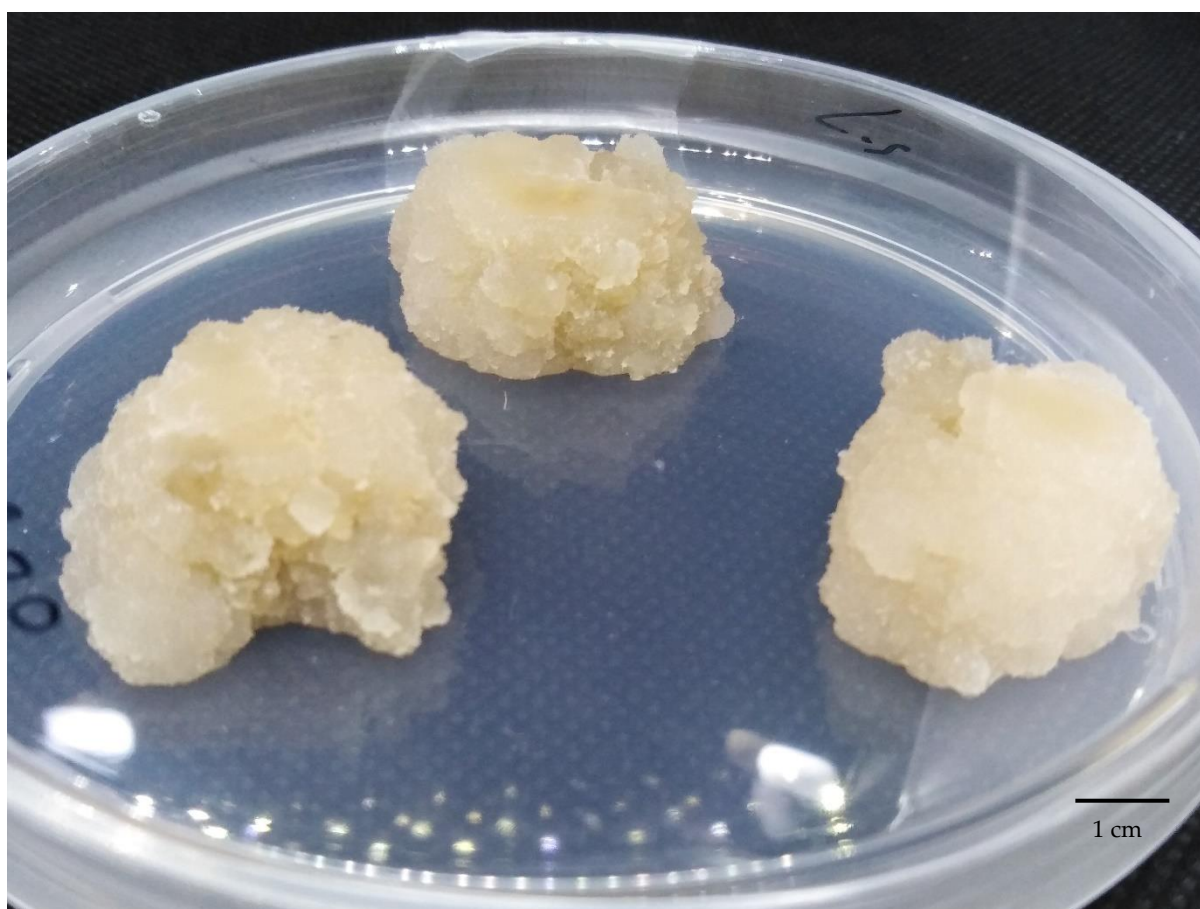

Figure S2. Side view of callus cultures of *L. schweinfurthii* multiplied on MS medium supplemented with 2 mgL<sup>-1</sup> NAA.

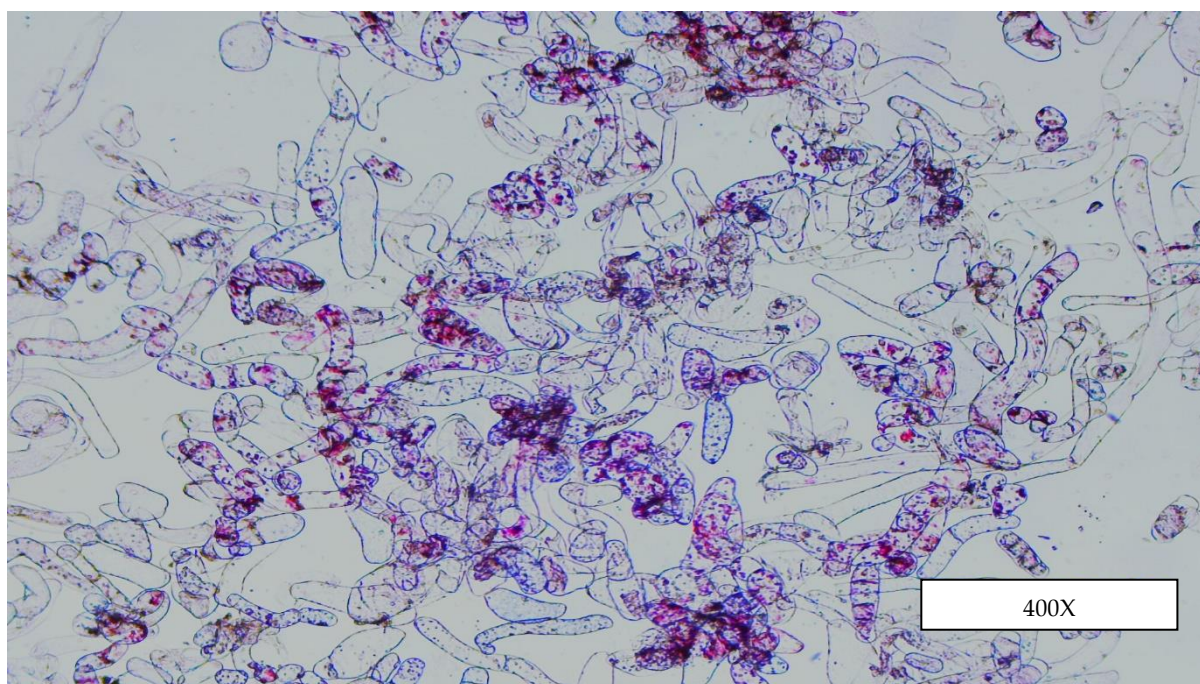

Figure S3. Microscopic examination of *L. schweinfurthii* cell cultures after incubation for 6 hours with 1% TTC (2,3,5-triphenyl tetrazolium chloride) showing the red-violet stained living cells using light microscope.

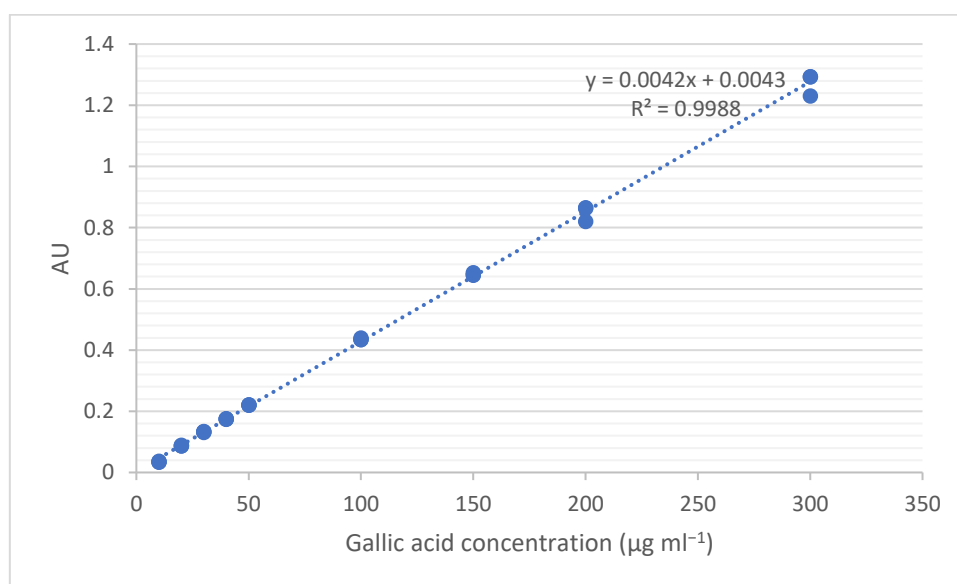

Figure S4. Gallic acid standard curve generated of different concentrations between 10 and 300 µg ml<sup>-1</sup> showing the absorbance measurements of 4 replicates at 750 nm measured by Folin-Ciocalteu assay.

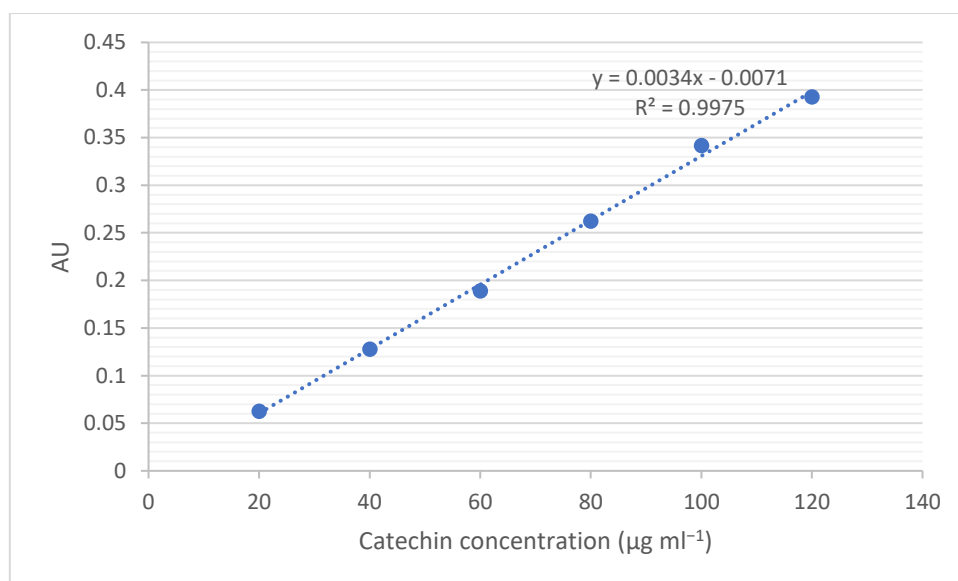

Figure S5. Catechin standard curve generated of different concentrations between 20 and 120 µg ml<sup>-1</sup> showing the absorbance measurements of 4 replicates at 510 nm measured by aluminum chloride assay.
